# Supplementary material
Source: publisher figshare collection journal article supplement (https://geolsoc.figshare.com/ndownloader/files/13586426)
Supplement: Supplementary file 1 [file 13586426]

## Sheet: Data
Sample nr:	A.B. 16-05	A.B. 16-29	A.B. 16-07	A.B. 16-11	A.B. 16-09	A.B. 16-04
Description:	grey granite	grey granite	grey granite	pink granite	pink granite	pink granite
Major elements (wt%)
SiO2	66.5	69.1	71.1	74.2	74.4	75.3
Al2O3	16.25	16.2	14.65	13.9	14.3	14.5
Fe2O3(T)	3.3	3.28	1.89	0.6	1.33	1.16
CaO	3.28	2.38	1.78	1.04	0.84	1
MgO	1.1	1.04	0.38	0.07	0.08	0.09
Na2O	4.57	4.74	4.46	3	3.76	3.66
K2O	2.73	2.92	3.09	5.85	4.89	5.39
Cr2O3	<0.01	<0.01	<0.01	<0.01	<0.01	<0.01
TiO2	0.48	0.44	0.25	0.05	0.12	0.06
MnO	0.04	0.04	0.02	0.01	0.01	0.01
P2O5	0.23	0.21	0.11	0.03	0.05	0.02
LOI	1.23	0.48	0.38	0.74	0.27	0.23
Total	99.97	101.09	98.27	99.64	100.24	101.56
Trace elements (ppm)
Ag	<0.5	<0.5	<0.5	<0.5	<0.5	<0.5
As	<5	<5	<5	5	<5	<5
Cd	<0.5	<0.5	<0.5	<0.5	<0.5	<0.5
Co	7	6	2	1	2	2
Cu	8	8	3	5	3	7
Li	20	20	10	<10	<10	<10
Mo	1	<1	<1	<1	<1	1
Ni	7	5	1	1	<1	1
Pb	14	20	27	30	33	31
Sc	4	4	2	1	1	2
Tl	10	<10	<10	<10	<10	<10
Zn	68	68	43	6	20	16
Ba	1410	1380	808	1035	1260	964
Ce	127.5	110	72	15.7	28.7	34.9
Cr	20	20	10	10	10	20
Cs	3.42	1.8	1.96	1.58	1.46	1.57
Dy	2.3	2.28	0.91	1.76	0.74	1.09
Er	1.02	1.01	0.4	0.87	0.31	0.37
Eu	1.34	1.18	0.63	0.65	0.45	0.49
Ga	21.4	21.2	20.4	21.5	18.7	17.1
Gd	3.29	2.97	1.64	1.36	1.15	1.86
Hf	5.1	5.3	3.9	1.8	2.6	1
Ho	0.37	0.42	0.15	0.34	0.12	0.17
La	76	68.2	43.9	8.5	14.8	17.4
Lu	0.1	0.15	0.05	0.12	0.05	0.04
Nb	12	11.8	7.9	2.9	4.2	5.8
Nd	40.9	36.6	21.7	6	9.7	14.5
Pr	12.45	11.1	6.73	1.72	2.89	3.95
Rb	81.5	77.1	74.8	125.5	106.5	104.5
Sm	5.92	5.18	3.15	1.35	1.66	3.08
Sn	2	2	1	1	1	1
Sr	1030	932	654	345	410	355
Ta	0.8	0.7	0.4	0.2	<0.1	1.8
Tb	0.42	0.45	0.21	0.28	0.18	0.28
Th	19.15	19.4	15.5	4.4	6.45	8.78
Tm	0.12	0.15	0.07	0.13	0.04	0.05
U	2.19	2.41	1.37	1.44	1.17	1.27
V	46	40	21	8	8	7
W	1	2	1	1	1	1
Y	10.1	10.5	4.7	10.1	3.7	4.5
Yb	0.82	0.95	0.49	0.82	0.32	0.29
Zr	223	211	144	37	69	23
